# Supplementary material
Source: MDPI journal article supplement (https://www.mdpi.com/2073-4344/12/3/259)
Supplement: s1 [file s1]

Supplementary Information

# Green Synthesis of Flowerball-Like MoS<sub>2</sub>/VC Nanocomposite and Its Efficient Catalytic Performance for Oxygen Reduction Either in Alkaline or Acid Media

Xiaofeng Zhang <sup>1</sup>, Yayun Ke <sup>1</sup>, Ting Wang <sup>1</sup>, Jiannan Cai <sup>1</sup>, Qiufeng Huang <sup>1</sup> and Shen Lin <sup>2,3,\*</sup>

<sup>1</sup> College of Chemistry and Materials Science, Fujian Normal University, Fuzhou 350007, Fujian, China; xfx\_fz@163.com (X.Z.); keyy1058@163.com (Y.K.); wt071421@163.com (T.W.); asw19931126@163.com (J.C.); qiufenghuang@fjnu.edu.cn (Q.H.)

<sup>2</sup> Fujian Provincial Key Laboratory of Polymer Materials, Fuzhou 350007, Fujian, China

<sup>3</sup> Fujian Provincial Key of Advanced Materials Oriented Chemical Engineering, Fuzhou 350007, Fujian, China

\* Correspondence: shenlin@fjnu.edu.cn

**Citation:** Zhang, X.; Ke, Y.; Wang, T.; Cai, J.; Huang, Q.; Lin, S. Green Synthesis of Flowerball-like MoS<sub>2</sub>/VC Nanocomposite and Its Efficient Catalytic Performance for Oxygen Reduction Either in Alkaline or Acid Media. *Catalysts* **2022**, *12*, 259. <https://doi.org/10.3390/catal12030259>

Academic Editors: Vincenzo Vaiano and Olga Sacco

Received: 27 January 2022

Accepted: 21 February 2022

Published: 25 February 2022

**Publisher's Note:** MDPI stays neutral with regard to jurisdictional claims in published maps and institutional affiliations.

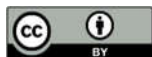

**Copyright:** © 2022 by the authors. Submitted for possible open access publication under the terms and conditions of the Creative Commons Attribution (CC BY) license (<https://creativecommons.org/licenses/by/4.0/>).

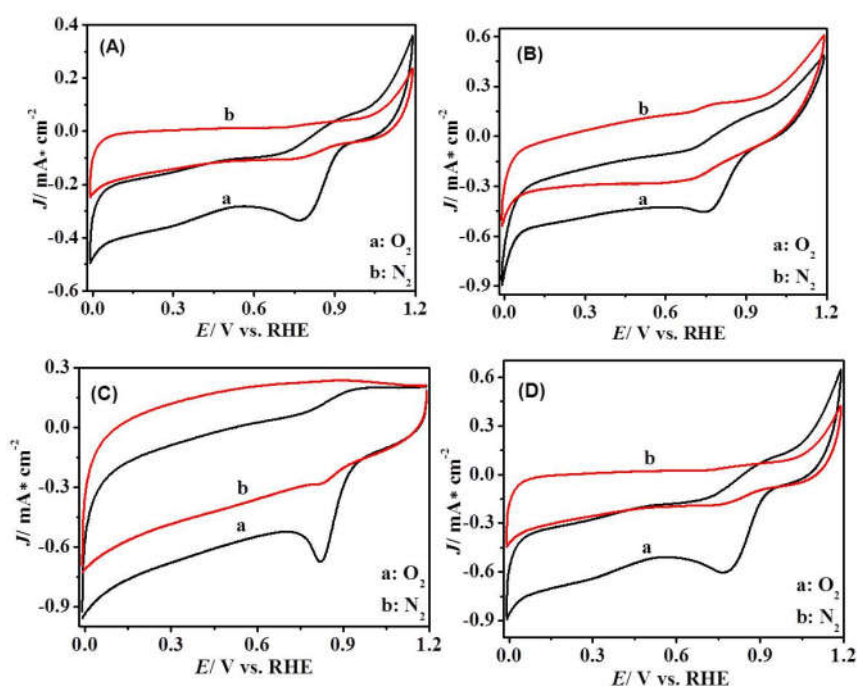

**Figure S1.** Cyclic voltammograms of (A) MoS<sub>2</sub>/C-15, (B) MoS<sub>2</sub>/C-20, (C) MoS<sub>2</sub>/C-25 and (D) MoS<sub>2</sub>/C-30 in N<sub>2</sub> and O<sub>2</sub>-saturated 0.1 M KOH solution. Scan rate: 30 mV s<sup>-1</sup>.

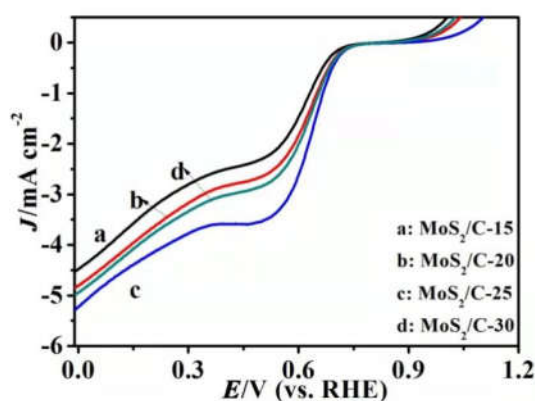

**Figure S2.** ORR polarization curves of different modified electrode: (a) MoS<sub>2</sub>/C-15, (b) MoS<sub>2</sub>/C-20, (c) MoS<sub>2</sub>/C-25 and (d) MoS<sub>2</sub>/C-30 in O<sub>2</sub>-saturated 0.1 M KOH solution at 1600 rpm rotation rate; scan rate: 10 mV s<sup>-1</sup>.

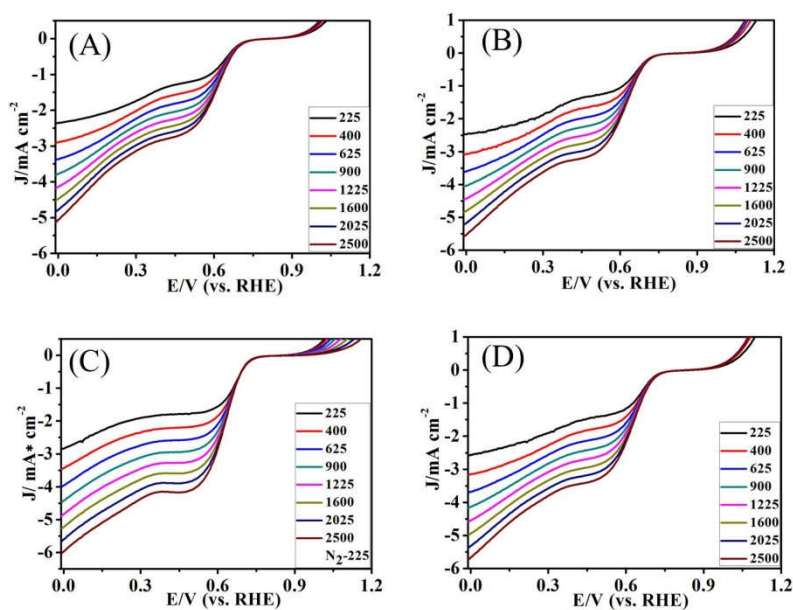

**Figure S3.** LSV curves of the MoS<sub>2</sub>/C-15 (A), MoS<sub>2</sub>/C-20 (B), MoS<sub>2</sub>/C-25 (C) and MoS<sub>2</sub>/C-30 (D) in O<sub>2</sub>-saturated 0.1 M KOH solution at different rotation rates; scan rate: 10 mV s<sup>-1</sup>.

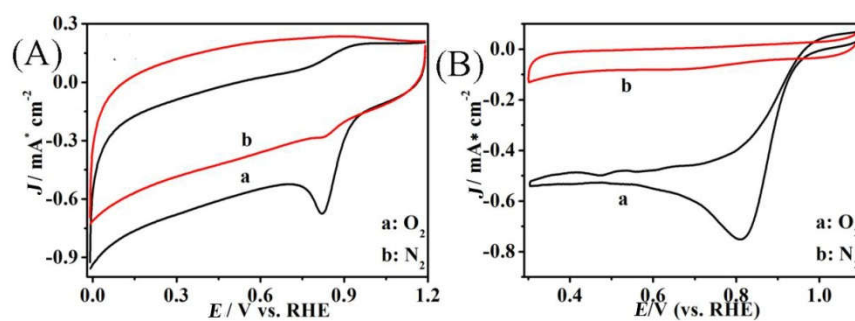

**Figure S4.** CVs of MoS<sub>2</sub>/C-25 in different solution: (A) O<sub>2</sub>-saturated 0.1 M KOH solution; (B) O<sub>2</sub>-saturated 0.1 M HClO<sub>4</sub> solution. Scan rate: 30 mV s<sup>-1</sup>.

**Table S1.** Comparison of the performance of MoS<sub>2</sub>-based electrocatalysts for ORR.

| Catalyst                             | electrolyte                           | ORR onset /V                     | $J_L/mAcm^{-2}$  | n            | Ref. <sup>a</sup>      |
|--------------------------------------|---------------------------------------|----------------------------------|------------------|--------------|------------------------|
| MoS <sub>2</sub> /NG                 | 0.1 M KOH                             | -0.12 (vs. SCE)                  | ~ 4.01           | 3.75-3.90    | Ref.15                 |
| MoS <sub>2</sub> /graphene           | 0.1 M KOH                             | 0.91 (vs. RHE)                   | ~ 4.56           | 3.8          | Ref.11                 |
| MoS <sub>2</sub> @NSC                | 0.1 M KOH                             | 0.93 (vs. RHE)                   | ~ 4.30           | 4.12-4.15    | Ref.27                 |
| MoS <sub>2</sub> -CNT                | 0.1 M KOH                             | -0.35(vs.Ag/AgCl )               | ~ 5.51           | ~ 4          | Ref.28                 |
| Flowerball-like MoS <sub>2</sub> /VC | 0.1 M KOH and 0.1 M HClO <sub>4</sub> | 0.82 (vs. RHE)<br>0.90 (vs. RHE) | ~ 5.34<br>~ 7.39 | 3.90<br>3.98 | This work<br>This work |

<sup>a</sup> Ref. 11, 15, 27, 28 are the cited references in the main text.

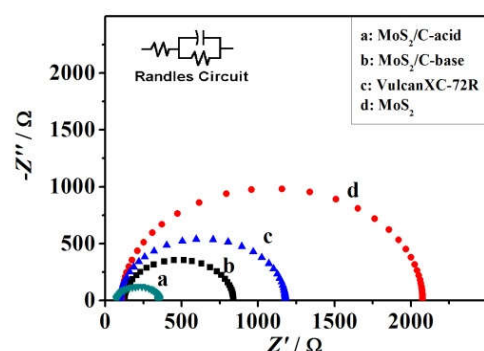**Figure S5.** Nyquist plots of the different modified electrodes: (a) MoS<sub>2</sub>/C in 0.1 M HClO<sub>4</sub> solution, (b) MoS<sub>2</sub>/C, (c) VulcanXC-72R and (d) MoS<sub>2</sub> in 0.1 M KOH solution.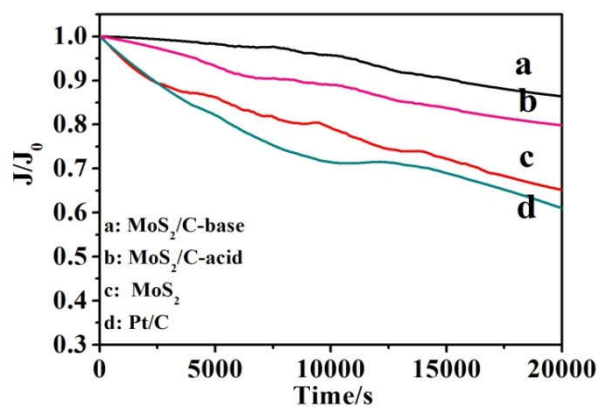**Figure S6.** Chronoamperometric curves of different modified electrodes: (a) MoS<sub>2</sub>/C-base, (b) MoS<sub>2</sub>/C-acid, (c) MoS<sub>2</sub> and (d) Pt/C in O<sub>2</sub>-saturated 0.1 M KOH/0.1 M HClO<sub>4</sub> solution for 20 000 s.
